# Supplementary material for: Does an eHealth Intervention Reduce Complications and Healthcare Resources? A mHeart Single-Center Randomized-Controlled Trial
Source: MDPI journal article supplement (doi:10.3390/jcdd10020077), 2023-02-10
Supplement: s1 [file s1]

### Supplementary Material

**Table S1.** Cardiovascular events described during the study in the control (CG) and intervention (IG) groups.

| Cardiovascular event           | CG              | IG              | All participants | P value      |
|--------------------------------|-----------------|-----------------|------------------|--------------|
| Cerebrovascular disease        | 2               | 1               | 3                |              |
| Angina / myocardial infarction | 2               | 0               | 2                |              |
| Heart failure                  | 0               | 0               | 0                |              |
| Arteriopathy                   | 1               | 1               | 2                |              |
| Syncope                        | 0               | 0               | 0                |              |
| Atrial fibrillation            | 1               | 0               | 1                |              |
| Need pacemaker                 | 1               | 0               | 1                |              |
| Revascularization              | 3               | 0               | 3                |              |
| Others                         | 2               | 2               | 4                |              |
| <b>Total n (%)</b>             | <b>12 (2.4)</b> | <b>2 (0.35)</b> | <b>14 (1.3)</b>  | <b>0.006</b> |

Abbreviations: CG, control group; IG, intervention group.

**Table S2.** Infections recorded during the study in the control (CG) and intervention (IG) groups.

|                     | CG                | IG               | All participants | P value       |
|---------------------|-------------------|------------------|------------------|---------------|
| Sepsis              | 4                 | 0                | 4                |               |
| Pneumonia           | 3                 | 1                | 4                |               |
| Others              | 10                | 4                | 14               |               |
| <b>Total (n; %)</b> | <b>17 (56.0%)</b> | <b>5 (17.2%)</b> | <b>22</b>        | <b>p=0.03</b> |

Abbreviations: CG, control group; IG, intervention group.

**Table S3.** Analytical parameters collected during the study in the control (CG) and intervention (IG) groups.

|                     | CG            | IG            | All participants | P value |
|---------------------|---------------|---------------|------------------|---------|
| High Hba1c (n/N; %) | 34/57 (59.6)) | 29/71 (40.80) | 63/128 (49.2)    | 0.03    |
| High HDL (n/N; %)   | 5/43 (11.6)   | 18/55 (32.7)  | 23/98 (23.5)     | 0.01    |
| High LDL (n/N; %)   | 0/43 (0)      | 1/55 (1.8)    | 1/98 (1.0)       | 0.5     |
| High TG (n/N; %)    | 21/58 (36.2)  | 22/71 (30.9)  | 43/129 (33.3)    | 0.3     |

Abbreviations: CG, control group; IG, intervention group; Hba1c, glycated haemoglobin A1c; HDL, high-density lipoprotein; LDL, low-density lipoprotein; TG, triglycerides.
